## A POU gene required for early cleavage and protein accumulation in the sea urchin embryo

Bharat R. Char<sup>†</sup>, Hongying Tan, and Rob Maxson\*

Department of Biochemistry and Molecular Biology, Kenneth R. Norris Cancer Hospital and Institute, University of Southern California School of Medicine, 1441 Eastlake Avenue, Los Angeles, CA 90033, USA

\*Author for correspondence

<sup>†</sup>Present address: Plant Gene Expression Center, 800 Buchanan Street, Albany, CA 94710, USA

### SUMMARY

*SpOct* is a POU gene expressed during oogenesis and early embryogenesis of the sea urchin, *Strongylocentrotus purpuratus*. In the first use of antisense technology in the sea urchin embryo, we report that disruption of *SpOct* gene function in 1-cell zygotes by the injection of antisense oligodeoxynucleotides arrests development prior to the first cell division. We show that single-stranded antisense oligodeoxynucleotides specifically block cleavage, and that injection of *SpOct* mRNA overcomes this block. The accumulation of [<sup>35</sup>S]methionine into zygotically synthesized protein is significantly reduced in antisense-injected embryos. DNA synthesis is also reduced by the antisense

regimen as expected from the antisense inhibition of protein accumulation. That protein accumulation prior to the first cleavage is retarded by antisense targeting of a transcription factor is very surprising in light of classical work showing that the activation of protein synthesis does not require zygotic transcription. We conclude that either some new transcription is obligate for the accumulation of new protein, or that the *SpOct* gene plays a novel, non-transcriptional role in this process.

Key words: sea urchin, POU transcription factor, *SpOct* gene, cleavage, cell division

### INTRODUCTION

The POU proteins, characterized by the highly conservative DNA-binding motif known as the POU domain, include the Oct and Pit families of transcription factors, and the *Unc 86* gene product of *Caenorhabditis elegans*. Members of these gene families have been found in organisms ranging from mammals to arthropods (Rosenfeld, 1991; Verrijzer and Van der Vliet, 1993), and several are expressed in a developmental stage-specific (He et al., 1989; Billin et al., 1991; Dick et al., 1991) or tissue-specific manner (Clerc et al., 1988; Gerster et al., 1990; Tanaka and Herr, 1990). We recently isolated a sea urchin (*Strongylocentrotus purpuratus*) POU gene, designated *SpOct*, whose derived protein's amino acid sequence places it in the Oct family, equidistant from mammalian *Oct 1* and *Oct 2* (Char et al., 1993). *SpOct* is expressed in oogenesis and early embryogenesis, and it encodes the predominant octamer-binding protein in early embryos.

There is little information on the function of POU genes in early development. Oct 1 and Oct 2 can stimulate the replication of adenovirus DNA (O'Neill et al., 1988; Verrijzer et al., 1990), suggesting that they may have a role in DNA replication. Injection of an excess of the octamer target DNA sequence into sea urchin zygotes results in embryonic arrest at various stages from blastula to pluteus (Franks et al., 1990). Although the identity of the proteins that bind the octamer element in this experiment is not known, the developmental

arrest phenotype suggests that at least some targets of *SpOct* regulation are critically important for embryogenesis. One such target may be the  $\alpha$  *H2B histone* gene: an octamer element is necessary for the zygotic expression of this gene, and the *SpOct* protein binds the  $\alpha$  *H2B* octamer element avidly (Char et al., 1993; Bell et al., 1992).

We wished to examine further the function of the *SpOct* gene in sea urchin development. At the same time, we wished to test gene perturbation technologies that would allow direct analysis of gene function in the sea urchin embryo, a simple developmental system, well-suited to experimental embryology, but lacking genetics. One approach to reducing the activity of a specific gene in embryos is to microinject antisense oligonucleotides against a target mRNA into 1-cell zygotes or blastomeres of early embryos, thereby triggering the degradation of the mRNA by RNase H (Minshull and Hunt, 1986; Dash et al., 1987). In the first use of this technology in the sea urchin embryo, we show that reduction of *SpOct* gene function in 1-cell zygotes by the injection of antisense oligodeoxynucleotides specifically blocks cleavage and retards the incorporation of [<sup>35</sup>S]methionine into protein. This effect on protein accumulation is surprising in light of classical work showing that protein synthesis prior to the first cleavage does not require zygotic transcription (reviewed in Davidson, 1977), and it suggests that the *SpOct* protein may play a novel, non-transcriptional role in this process.

## MATERIALS AND METHODS

### RNase protection

RNase protection analysis of  $\alpha$  *H2B histone* mRNA was carried out as described (Colin et al., 1988; Bell et al., 1992). The probe was a 500 nt,  $^{32}$ P-labeled antisense RNA spanning the transcription start.

### Oligonucleotide (ODN) preparation and sea urchin zygote injections

All ODNs were synthesized on an Applied Biosystems DNA synthesizer. ODNs were passed over a Sep-pak (C18) column (Waters), ethanol precipitated, and then purified on an Elutip column (S&S) followed by another ethanol precipitation. The nucleotide sequences of the ODNs were:  $\alpha$  *H2B histone* antisense, 5'-TGGAGCCATGATGAA-3' (spanning the translation start codon), its sense strand, 5'-TTCATCATGGCTCCA-3'; *fibropellin 1* antisense ODN, 5'-GATCCAGGTGGTGTAGAGAA-3' (the inverse complement of nucleotides 3200-3219 of the *fibropellin 1* gene, Grimwade et al., 1991); *SpOct* antisense ODNs a1 (5'-TTCGGGGCTATTGTGAG-3', the inverse complement of nucleotides 1666-1682 in the *SpOct* cDNA), a2 (5'-CACCTGGAAGTTAGCC-3', the inverse complement of nucleotides 479-495 in the *SpOct* cDNA), a3 (5'-TCAGT-GTTCATGATGAGGACA-3', the inverse complement of -10 to +11 in the *SpOct* cDNA), and a4 (5'-ATCTGGGCATCGGAAGATTGT-3' complementary to -56 to -36 in the *SpOct* cDNA); and control ODNs c2 (5'-ACCAACATTAGGATATCG-3', nucleotides 1722-1739 in the *SpOct* cDNA), c1 (5'-CAGCGCCAGCCGAGG-3', a fragment of 5' non-translated sequence from the mouse *Msx2* gene) and c3 (5'-GCTGAGCAAGTGTAGATATCC-3', a randomized version of a3).

ODNs were injected at a concentration of 1 mg/ml in 25% sterile glycerol, except when otherwise indicated. Injections were performed immediately after eggs were fertilized as described (Bell et al., 1992). 30-50 embryos were injected per dish, with both antisense and control ODNs usually injected into the same batch of eggs. Injected embryos were incubated at 15°C. Experiments were considered valid only if 70% or more of the embryos survived the injection. Only embryos that appeared viable under the light microscope through 8 hours were counted; those damaged during the injection process were discarded. Non-injected, fertilized embryos were also followed over the course of each experiment (data not shown).

### In vitro transcription of injected mRNAs

Full-length *SpOct* (Char et al., 1993) and a genomic clone of the *S. purpuratus SpMsx* gene (S. Dobias and R. Maxson, unpublished data) were transcribed using the Megascript kit (Ambion). Transcripts were capped at their 5' ends with m<sup>7</sup>G(5')ppp(5')G (Ambion) and co-injected with ODNs into 1-cell zygotes at a concentration of 1.5 mg/ml.

### Measurement of DNA synthesis

Following injection, embryos were incubated at 15°C in filtered sea water containing 50 mCi/ml of [<sup>3</sup>H]thymidine. After 2.5 hours, embryos were collected and washed three times in sea water and lysed in 0.5% SDS. 20 mg of yeast RNA was added to each sample and DNA was precipitated with ice-cold TCA at a final concentration of 10%. Samples were collected on GF/C filters and washed four times with 5 ml of 10% TCA, and three times with 5 ml of cold 95% ethanol. Filters were air-dried, treated with Protosol and counted in Omnifluor (New England Nuclear).

### Measurement of protein synthesis

Embryos were incubated at 15°C in filtered sea water containing 50-100 mCi/ml of [<sup>35</sup>S]methionine (Amersham) immediately after injection. They were collected by centrifugation, washed 3× with sea water, lysed in 20 ml of NETS-EGTA (Bell et al., 1992) and precipitated

with ice-cold 10% TCA. The precipitates were collected by centrifugation, resuspended in 2× SDS sample buffer and either dried on a GF/C filter (Whatman) for counting, or loaded on an 8.5% acrylamide-SDS gel.

## RESULTS

To test the applicability of the antisense approach to the sea urchin embryo, we first asked whether injection of antisense oligodeoxynucleotides against a maternal mRNA caused its degradation. We chose as the test subject the abundant maternal message encoding  $\alpha$  *H2B histone* (Maxson et al., 1983) rather than the rare and thus difficult to quantitate *SpOct* mRNA (Char et al., 1993). Antisense  $\alpha$  H2B and control ODNs were injected into fertilized eggs, and RNA was harvested and analyzed for  $\alpha$  H2B mRNA by RNase protection. The amount of  $\alpha$  H2B mRNA was substantially reduced in the antisense injected eggs (Fig. 1A). We tested the specificity of the antisense-mediated degradation of mRNA by injecting an antisense ODN against *SpOct* and monitoring  $\alpha$  *H2B histone* mRNA levels. *SpOct* ODN-injected embryos contained levels of  $\alpha$  H2B mRNA identical to control-injected embryos (Fig. 1B). The data presented in Fig. 1 thus demonstrate that, in the sea urchin embryo, as in *Xenopus*, antisense ODNs specifically cause the degradation of their target mRNAs.

We next asked whether the injection of ODNs directed against the *SpOct* mRNA affected embryonic development. We used three different antisense and corresponding control ODNs synthesized at different times, thus minimizing the possibility that antisense-induced phenotypes were the result of contaminants in the ODNs. Control ODNs were an *SpOct* sense-strand, a random sequence ODN, or an antisense ODN for an unrelated gene (For ODN sequences see Materials and Methods). Injection of ODN a2 resulted in the cleavage-arrest of 69% of the embryos (Fig. 2A). Injection of a1 (Fig. 2B) or a3 (data not shown) resulted in the cleavage arrest of approximately 30% of the embryos and a retardation in the rate of development of a large proportion of injected zygotes. Pooled data from experiments carried out with a1, a2 and a3, as well as control ODNs c1, c2 and c3 are shown in Fig. 2C. Upon injection of antisense ODNs, 74±11% of the embryos failed to undergo the first embryonic cleavage at the normal time while only about 10±3% of control ODN-injected embryos remained uncleaved.

That cleavage arrest was caused by three different antisense ODNs and not by control ODNs strongly suggested that this effect was specific. Nevertheless, to rule out decisively the possibility that contaminants caused the arrest in development, we injected 1-cell zygotes with a double-stranded ODN composed of the a1 antisense ODN annealed with its complement. In parallel, ODN a1 was mixed with an irrelevant ODN, c1, and injected into embryos. Only 13±2% of the embryos injected with the antisense+irrelevant ODN mixture cleaved by 2 hours, whereas 85±2% of the double-stranded ODN-injected embryos did so (Fig. 3A). At 4 hours, cleavage had occurred in 25% of antisense+irrelevant ODN-injected embryos and 100% of double-stranded ODN-injected embryos (data not shown). Thus, the cleavage-arrest phenotype was not caused by a cytotoxic contaminant in the antisense ODN solution.

If single-stranded antisense ODNs cause developmental

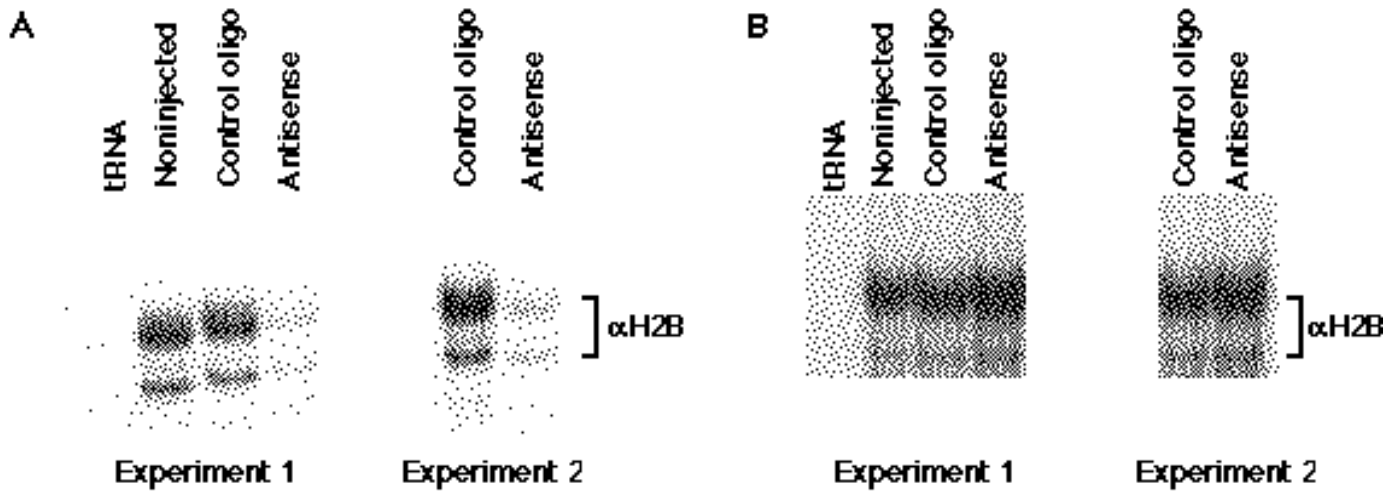

**Fig. 1.** Effect of antisense  $\alpha H2B$  histone ODN on  $\alpha H2B$  histone mRNA levels in sea urchin zygotes assayed by RNase protection. Embryos were fertilized and immediately injected with control or antisense ODNs. After 2 hours of incubation, whole-embryo RNA was extracted and analyzed for  $\alpha H2B$  mRNA by RNase protection. The probe was a 500 nt,  $^{32}P$ -labeled antisense RNA spanning the transcription start site (Colin et al., 1988). It was incubated with embryonic RNA samples or with tRNA as a control and the resultant hybrids were treated with RNase. The protected fragments were resolved on an acrylamide gel and visualized by autoradiography. Two protected products of approximately 150 and 100 nt (brackets), characteristic of  $\alpha H2B$  mRNA, are evident. (A)  $\alpha H2B$  histone mRNA levels in zygotes injected with control and antisense  $\alpha H2B$  ODNs (ODN sequences are given in Methods). (B) Control experiment showing  $\alpha H2B$  histone mRNA levels in zygotes injected with control (c3) or antisense (a3) *SpOct* ODNs. Two independent experiments are shown for both A and B.

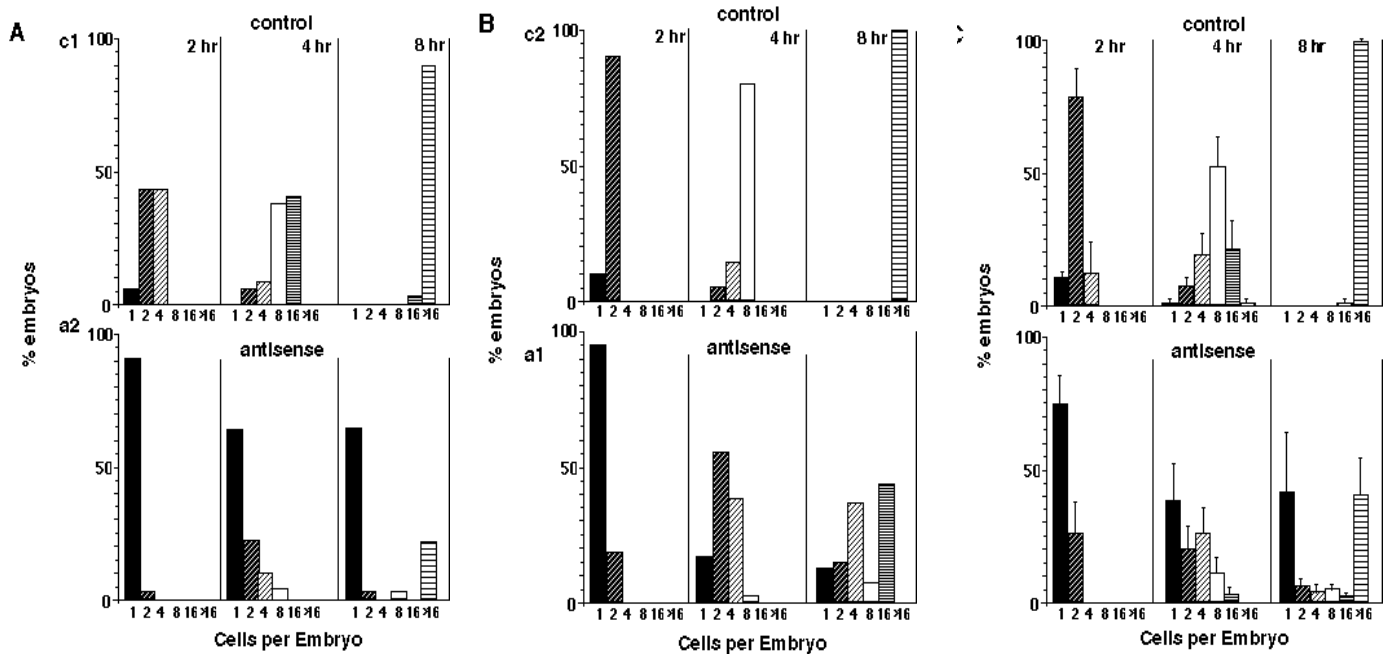

**Fig. 2.** Effect of antisense *SpOct* ODNs on early cleavage of sea urchin zygotes. Embryos were cultured and *SpOct* antisense or control ODNs injected as in Fig. 1. We show individual experiments using ODNs a2 ( $n=34$ ) and c1 ( $n=56$ ) (A), and a1 ( $n=47$ ) and c2 ( $n=60$ ) (B). (C) Pooled injection data for ODNs a1, a2 and a3 ( $n=197$  except for the 8 hour time point where  $n=154$ ) compared to ODNs c1, c2 and c3 ( $n=216$ ). The columns refer to mean per cent of embryos at each stage  $\pm$  s.e.m.

arrest by promoting the degradation of *SpOct* mRNA, then microinjection of in vitro-synthesized *SpOct* mRNA into antisense *SpOct* ODN-injected embryos should rescue them, while microinjection of an irrelevant mRNA should not. We injected an antisense ODN against the *SpOct* 5' non-coding sequence (ODN a4) into 1-cell zygotes along with either

*SpOct* mRNA or an irrelevant homeobox mRNA encoding a sea urchin Msx-class protein (S. Dobias and R. Maxson, unpublished data). The co-injected *SpOct* mRNA was transcribed from a cDNA lacking the 5' non-coding sequence to which the ODN was complementary. Co-injection of *SpOct* mRNA enabled  $64 \pm 3\%$  of the embryos to cleave by 2 hours,

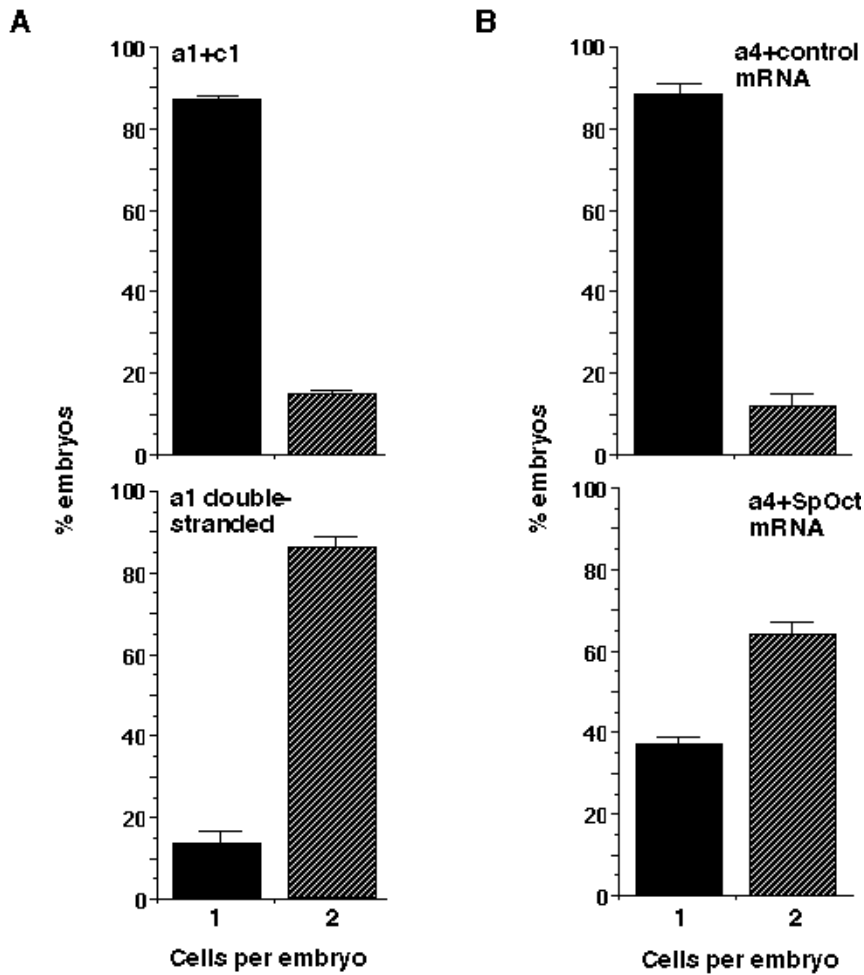

**Fig. 3.** Rescue of *SpOct* antisense ODN-injected embryos. (A) Injection of double-stranded ODNs. 1-cell zygotes were injected with either ODN a1 mixed with ODN c1 at 0.8 mg/ml each ( $n=88$ ), or with ODN a1 annealed to its complementary strand at 1 mg/ml ( $n=34$ ). Percentage cleavage was determined 2 hours after injection. The columns refer to mean percent of embryos  $\pm$  s.e.m. (B) Rescue of antisense ODN-injected embryos by in vitro synthesized *SpOct* mRNA. Antisense ODN a4 was co-injected with 1.5 mg/ml of capped *SpOct* transcript ( $a4+SpOct$ ),  $n=154$ . Control embryos were injected with ODN a4 and 1.5 mg/ml of capped mRNA transcribed from a genomic clone of the *S. purpuratus Msx* gene ( $a4+Msx$ ),  $n=280$ . *SpOct* and *Msx* mRNAs were transcribed using the Megascript kit (Ambion). Transcripts were capped at their 5' ends with  $m^7G(5')ppp(5')G$  (Ambion). The columns refer to mean percent of embryos  $\pm$  s.e.m.

whereas  $12\pm 3\%$  of the control-injected embryos did so (Fig. 3B). By 4 hours, cleavage had occurred in  $87\pm 3\%$  of *SpOct* mRNA-injected embryos and  $36\pm 5\%$  of control mRNA-injected embryos (data not shown). We conclude that injection of synthetic *SpOct* mRNA can rescue embryos in which endogenous *SpOct* gene function has been disrupted, demonstrating both that antisense *SpOct* ODNs act sequence-specifically to cause cleavage arrest, and that their target is *SpOct* mRNA.

What cellular processes are affected by the antisense *SpOct* regimen? In *S. purpuratus*, the rate of protein synthesis increases dramatically 5-10 minutes after fertilization, following a change in membrane potential, release of  $Ca^{2+}$  from internal compartments, and an increase in intracellular pH (Whitaker and Steinhardt, 1982). This activation of protein synthesis and the accumulation of new protein during the first few hours of development is mediated by maternal mRNAs (Dube et al., 1985). When fertilized eggs are treated with the protein synthesis inhibitors, DNA synthesis in the first cell cycle occurs normally, but development is arrested early in the first mitosis, and cell division fails to occur (Wilt et al., 1967; Wagenaar, 1983). This phenotype is similar to that observed in embryos injected with antisense *SpOct* ODNs. We thus hypothesized that the *SpOct* antisense treatment affected protein synthesis. As a test of this hypothesis, we measured

$[^{35}S]$ methionine incorporation into newly synthesized proteins in antisense *SpOct* ODN-injected and control ODN-injected embryos. Following injection of ODNs, zygotes were incubated with  $[^{35}S]$ methionine for 2 hours. In experiments in which antisense ODNs a3 or a1 were injected, incorporation of  $[^{35}S]$ methionine was reduced to  $31\pm 6\%$  as compared to ODN c2-injected embryos (Fig. 4). Size-separation of  $[^{35}S]$ methionine-labeled protein on one-dimensional SDS-PAGE gels failed to provide evidence for a selective effect on any size class of proteins (data not shown). These results indicate that the injection of antisense *SpOct* ODNs causes a significant, general inhibition in protein accumulation. This inhibition is not likely to be due to a general effect of antisense ODNs on protein accumulation or mRNA templates, since antisense ODNs against two maternal mRNAs other than *SpOct*,  $\alpha$  *H2B histone* mRNA and *fibropellin 1* (*SpEGF 1*) mRNA (Grimwade et al., 1991), did not reduce methionine incorporation into protein (Fig. 4). Neither did injection of *SpOct* antisense ODNs reduce levels of  $\alpha$  *H2B histone* mRNA (Fig. 1).

The role of Oct-1 in the replication of adenovirus DNA (O'Neill et al., 1988; Verrijzer et al., 1990) suggested that *SpOct* may participate in DNA replication in cleaving sea urchin blastomeres. Since the first S-phase is insensitive to inhibitors of protein synthesis (Wilt et al., 1967; Wagenaar,

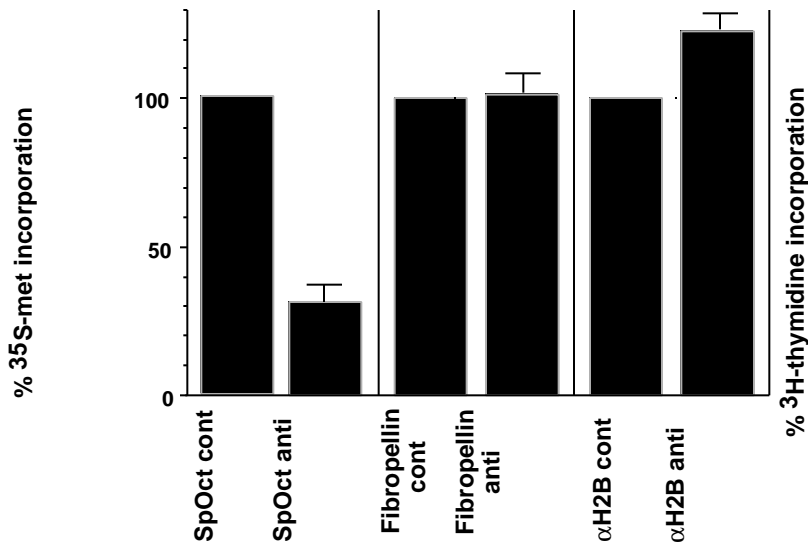

**Fig. 4.** Incorporation of [ $^{35}$ S]methionine into protein in *SpOct* antisense ODN-injected embryos. Antisense and control *SpOct*, *fibropellin 1* and  $\alpha$  *H2B histone* ODNs were injected into 1-cell zygotes and the incorporation of [ $^{35}$ S]methionine into newly synthesized protein was measured over a 2 hour time course. *SpOct* antisense ODNs a1 and a3 were compared to control ODN c2. The columns refer to percentage incorporation of [ $^{35}$ S]methionine relative to control-ODN injected embryos  $\pm$  s.e.m. of 5 experiments with *SpOct* ODNs and 3 experiments with *fibropellin* (*SpEGF*) 1 and  $\alpha$  *H2B histone* ODNs. Approximately 50-60 embryos were injected for each ODN per experiment. Total  $^{35}$ S incorporated for control-injected embryos was 6000-8000 counts/minute.

1983), the translation of *SpOct* mRNA is not required for the first S phase (though maternal *SpOct* protein might be). The question of whether *SpOct* is required for the second S phase, approximately 120 minutes after fertilization, is confounded by our finding that antisense targeting of *SpOct* mRNA reduces protein synthesis in 1-cell zygotes (Fig. 4), together with the fact that the second S phase does require new protein synthesis. Based on protein synthesis inhibitor studies, a 3-fold reduction in protein accumulation, at the threshold of the amount required to affect DNA replication, should cause a slight to moderate effect on [ $^3$ H]thymidine incorporation into DNA during the second S phase (F.H. Wilt, personal communication). Consistent with this prediction, we found that [ $^3$ H]thymidine incorporation into DNA in antisense-treated embryos in a 2.5 hour interval after fertilization was  $77 \pm 13\%$  of control ODN-injected embryos (Fig. 5). Essentially all of this incorporation was aphidicolin-sensitive (data not shown) and thus represented incorporation into nuclear DNA (Huberman, 1981). In such a continuous labeling regimen comprising both the first and second S phases, approximately two thirds of the [ $^3$ H]thymidine should have been incorporated in the second S phase. Thus we would expect a complete inhibition of [ $^3$ H]thymidine incorporation in the second S phase to result in 33% incorporation relative to controls. Our finding of 77% incorporation is therefore consistent with a partial inhibition of DNA replication during the second S-phase as expected from a 3-fold reduction of protein accumulation during the first 2 hours of development.

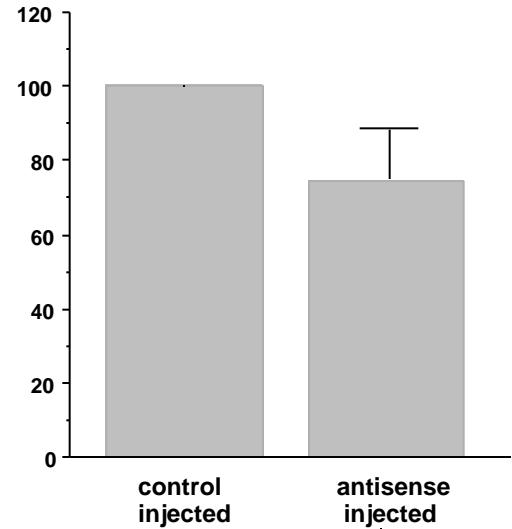

**Fig. 5.** Incorporation of [ $^3$ H]thymidine into DNA in *SpOct* antisense ODN-injected embryos. Approximately 60 embryos were injected with antisense ODN a1 or a3 in five separate experiments. A similar number were injected with control ODNs. Following injection, embryos were incubated at 15°C in filtered sea water containing [ $^3$ H]thymidine. After 2.5 hours, embryos were collected, lysed in buffer containing SDS and the DNA precipitated with TCA. TCA-insoluble radioactivity was determined by scintillation counting. The columns represent the relative incorporation of [ $^3$ H]thymidine  $\pm$  s.e.m. Total [ $^3$ H] incorporated for control-injected embryos was 978-3988 counts/minute.

## DISCUSSION

We have demonstrated that injection of antisense ODNs against the *SpOct* mRNA both retards cleavage and reduces protein accumulation in sea urchin zygotes. Several lines of evidence support the view that these antisense effects on embryonic cleavage and protein accumulation are a specific consequence of the *SpOct* ODNs. First, injection of antisense, sense, or duplex sense-antisense ODNs rules out a dominant, non-specific inhibitory contaminant in the antisense ODN preparation as the cause of the antisense phenotype. Second, injection of *SpOct* mRNA rescues the cleavage arrest phenotype, demonstrating that it is a specific result of the targeting of *SpOct* mRNA. Third, antisense ODNs against two other maternal mRNAs,  $\alpha$  *H2B histone* and *fibropellin 1*, do not affect either cleavage or protein synthesis. Therefore, neither the cleavage-arrest nor the protein accumulation phenotypes can be attributed to a general effect of ODN-mRNA hybrids. Our results thus demonstrate that antisense ODNs offer an effective means of targeting maternal templates in sea urchin embryos. Since we do not know the half-life of injected ODNs, we do not yet know if they will prove effective against zygotic mRNAs that accumulate after early cleavage.

Antisense ODNs have been shown to affect transcript levels, translation or both (Minshull and Hunt, 1986; Dash et al., 1987; Stein and Cheng, 1993). Our analysis of a model template,  $\alpha$  *H2B histone* mRNA, suggests an effect on mRNA amount, probably via an RNase H-mediated cleavage of the mRNA template. However, since  $\alpha$  *H2B histone* mRNA is sequestered

in the nucleus in the 1-cell zygote until approximately 80 minutes after fertilization (Showman et al., 1982; DeLeon et al., 1982), antisense ODNs may affect it differently from other sea urchin maternal mRNAs. The analysis of additional maternal templates will clarify this point.

Our data demonstrate that *SpOct* antisense ODNs inhibit protein accumulation over a 2 hour interval following fertilization. We have not performed a kinetic analysis of the antisense effect; thus we do not know whether the effect is at the level of protein synthesis, decay, or both. Whichever process is affected, it is extremely surprising that SpOct, a member of the well-studied family of Oct transcription factors (Char et al., 1993), is required for the accumulation of new protein during early cleavage, a process that does not depend on new transcription. Classical experiments have shown that embryos reared in the presence of the transcription inhibitor actinomycin D accumulate radioactive amino acids into new protein during the first few hours of development in a manner indistinguishable from control embryos (Gross and Cousineau, 1964). Moreover, enucleated merogones, when parthenogenetically activated, synthesize protein at a near-normal rate (Brachet et al., 1963; Denny and Tyler, 1964; Craig and Piatigorsky, 1971). These data have long been interpreted as evidence that egg activation, including the activation of protein synthesis and early accumulation of protein, is independent of zygotic transcription (e.g., Davidson, 1977).

Why then is *SpOct* mRNA, and presumably *SpOct* protein, required for protein accumulation during early development? Our results are consistent with two possibilities, each requiring revision of a currently accepted paradigm. First, in spite of the actinomycin D data (Gross and Cousineau, 1964), some new transcription may be required for the early accumulation of protein, and SpOct may play a role in such transcription. In the actinomycin D experiments, a small amount of zygotic transcription could have escaped the drug blockade, allowing the synthesis of a sufficient amount of a critical factor to activate translation and accumulate new protein normally. The merogon experiments (Brachet et al., 1963; Denny and Tyler, 1964; Craig and Piatigorsky, 1971) pose a more significant challenge to the proposition that zygotic transcription is required for events in egg activation and early cleavage. It is possible that, although enucleated merogones initiate protein synthesis in a quantitatively normal way upon parthenogenetic activation, they do so via a non-physiological mechanism that is distinct from that of normal egg activation.

A second, and we think more likely explanation of the *SpOct* antisense phenotype is that SpOct has a novel, non-transcriptional function in protein accumulation during early cleavage. It may, for example, participate in the mobilization of maternal mRNA for translation; it may have a direct role in translation; or it may be a component of the signal transduction pathway entrained by the interaction of the sperm with the cell membrane and culminating in the activation of protein synthesis.

The *SpOct* antisense effect on protein accumulation can explain why antisense-treated embryos cleave at an abnormally slow rate. The general inhibition of protein synthesis probably prevents the normal accumulation of proteins required for the process of cell division, likely including cyclins (Rosenthal et al., 1980). In the sea urchin, cyclins are encoded by maternal mRNAs (Evans et al., 1983). Synthesis of these proteins

increases linearly after fertilization in parallel with general protein synthesis. They are then destroyed during cell division and are resynthesized in the following cell cycle from stored templates (Swenson et al., 1986; Standart et al., 1987). There is a narrow time window during which the protein synthesis inhibitor emetine causes cleavage arrest. This window coincides with the synthesis of B-type cyclins, which serve as a regulatory subunit of MPF, a protein complex composed of the p34cdc2 protein kinase and cyclin B (Draetta et al., 1989). By preventing the normal activation of protein synthesis, injection of antisense *SpOct* ODNs probably interferes with the activity of MPF, and consequently prevents or retards cell division.

We point out, however, that, although an effect on MPF is an attractive explanation of the retardation of cleavage, it is possible that this phenotype is unrelated to the effect of the *SpOct* antisense ODNs on protein synthesis. SpOct may regulate the activity of genes other than *cyclin B-p34cdc2* that are required for progression through the cell cycle. Although there are no obvious candidates for such genes, we can be fairly certain that histone genes are not among them. Even if inhibition of *SpOct* gene activity reduced the level of *SpOct*-dependent transcription of  $\alpha$  *H2B* histone genes, such a reduction probably would not cause early developmental arrest since sea urchin eggs are endowed with a sufficiently large store of histone mRNA and protein to meet the demands of DNA synthesis at least to the midblastula stage (Poccia, 1986).

This work was supported by NIH Grant HD18582 to R. M. and B. R. C. was supported in part by a Fellowship from the Smoot Foundation. We thank members of the Maxson laboratory and the Southwest Sea Urchin Society for helpful criticisms.

## REFERENCES

- Bell, J., Char, B. R. and Maxson, R. (1992). An octamer element is required for the expression of the alpha histone H2B gene during the early development of the sea urchin. *Dev. Biol.* **150**, 363-371.
- Billin, A. N., Cockerill K. A. and Poole, S. J. (1991). Isolation of a family of Drosophila POU domain genes expressed in early development. *Mech. Dev.* **34**, 75-84.
- Brachet, J., Ficq, A. and Tencer, R. (1963). Amino acid incorporation into proteins of nucleate and anucleate fragments of sea urchin eggs: effect of parthenogenetic activation. *Exp. Cell Res.* **32**, 168-170.
- Char, B.R., Bell, J. R., Dovala, J., Coffman, J. A., Harrington, M. G., Becerra, J. C., Davidson, E. H., Calzone, F. J. and Maxson, R. (1993). SpOct, a gene encoding the major octamer-binding protein in sea urchin embryos: expression profile, evolutionary relationships, and DNA binding of expressed protein. *Dev. Biol.* **158**, 350-363.
- Clerc, R. G., Corcoran, L. M., LeBowitz, J. H., Baltimore, D. and Sharp, P. A. (1988). The B-cell specific Oct-2 protein contains POU box- and homeobox-type domains. *Genes Dev.* **2**, 1570-1581.
- Colin, A., Catlin, T. L., Kidson, S. H., and Maxson, R. E. (1988) Closely linked early and late H2B histone genes are differentially expressed after injection into sea urchin zygotes. *Proc. Natl. Acad. Sci. USA* **85**, 507-510.
- Craig, S. P. and Piatigorsky, J. (1971). Protein synthesis and development in the absence of cytoplasmic RNA synthesis in non-nucleate egg fragments and embryos of sea urchins: effect of ethidium bromide. *Dev. Biol.* **24**, 214-232.
- Dash, P., Lotan, I., Knapp, M., Kandel, E. R. and Goelet, P. (1987). Selective elimination of mRNAs *in vivo*: Complementary oligodeoxynucleotides promote RNA degradation by an RNase H like activity. *Proc. Natl. Acad. Sci. USA* **84**, 7896-7900.
- Davidson, E. H. (1977). *Gene Activity in Early Development* 2nd ed., pp 98-99. New York: Academic Press.
- DeLeon, D. V., Cox, K. H., Angerer, L. M. and Angerer, R. C. (1983). Most

- early variant histone mRNA is contained in the pronucleus of sea urchin eggs. *Dev. Biol.* **100**, 197-206.
- Denny, P. C. and Tyler, A.** (1964). Activation of protein biosynthesis in non-nucleate fragments of sea urchin eggs. *Biochem. Biophys. Res. Com.* **14**, 245-249.
- Dick, T., Yang, X., Yeo, S. and Chia, W.** (1991). Two closely linked *Drosophila* POU domain genes are expressed in neuroblasts and sensory elements. *Proc. Natl. Acad. Sci. USA* **88**, 7645-7649.
- Draetta, G., Luca, F., Westendorf, J., Brizuela, L., Ruderman, J. and Beach, D.** (1989). cdc2 protein kinase is complexed with both cyclin A and B: evidence for proteolytic inactivation of MPF. *Cell* **56**, 829-838.
- Dube, F., Schmidt, T., Johnson, C. H. and Epel, E.** (1985). The hierarchy of requirements for an elevated intracellular pH during early development of sea urchin embryos. *Cell* **40**, 657-666.
- Evans, T., Rosenthal, E. T., Youngblom, J., Distel, D. and Hunt, T.** (1983). Cyclin: A protein specified by maternal mRNA in sea urchin eggs that is destroyed at each cleavage division. *Cell* **33**, 389-396.
- Franks, R. R., Anderson, R., Moore, J. G., Hough-Evans, B. R., Britten, R. J. and Davidson, E. H.** (1990). Competitive titration in living sea urchin embryos of regulatory factors required for expression of the *CyIIIa* actin gene. *Development* **110**, 31-40.
- Gerster, T., Balmaceda, C. and Roeder, R. G.** (1990). The cell-specific octamer transcription factor OTF-2 has two domains required for the activation of transcription. *EMBO J.* **9**, 1635-1643.
- Grimwade J. E., Gagnon, M. L., Yang, Q., Angerer, R. C. and Angerer, L. M.** (1991). Expression of two mRNAs encoding EGF-related proteins identifies subregions of sea urchin ectoderm. *Dev. Biol.* **143**, 44-57.
- Gross, P. R. and Cousineau, G. H.** (1964). Macromolecular synthesis and the influence of actinomycin D on early development. *Exp. Cell Res.* **33**, 363-395.
- He, X., Treacy, M. N., Simmons, D. M., Ingraham, H. A., Swanson, L. W. and Rosenfeld, M. G.** (1989). Expression of a large family of POU-domain regulatory genes in mammalian brain development. *Nature* **340**, 35-42.
- Huberman, J. A.** (1981). New views of the biochemistry of eucaryotic DNA replication revealed by aphidicolin, an unusual inhibitor of DNA polymerase alpha. *Cell* **23**, 647-648.
- Maxson, R., Mohun, T., Cohn, R. and Kedes, L.** (1983). Expression and organization of histone genes. *Annu. Rev. Genet.* **17**, 239-277.
- Minshull, J. and Hunt, T.** (1986). The use of single-stranded DNA and RNaseH to promote quantitative 'hybrid arrest of translation' of mRNA-DNA hybrids in reticulocyte lysate cell-free translations. *Nucleic Acids Res.* **14**, 6433-6451.
- O'Neill, E. A., Fletcher, C., Burrow, C. R., Heintz, N., Roeder, R. G. and Kelley, T. J.** (1988). Transcription factor OTF-1 is functionally identical to the DNA replication factor NF-III. *Science* **241**, 1210-1213.
- Poccia, D.** (1986). Remodeling of nucleoproteins during gametogenesis, fertilization and early development. *Int. Rev. Cytol.* **105**, 1-65.
- Rosenfeld, M. G.** (1991). POU-domain transcription factors: pou-er-ful developmental regulators. *Genes Dev.* **5**, 897-907.
- Rosenthal, E. T., Hunt, T. and Ruderman, J. V.** (1980). Selective translation of mRNA controls the pattern of protein synthesis during early development of the surf clam, *Spisula solidissima*. *Cell* **20**, 487-494.
- Showman, R. M., Wells, D. E., Anstrom, J., Hursh, D. A. and Raff, R. A.** (1982). Message-specific sequestration of maternal histone mRNA in the sea urchin egg. *Proc. Natl. Acad. Sci. USA* **79**, 5944-5947.
- Standart, N., Minshull, J., Pines, J. and Hunt, T.** (1987). Cyclin synthesis, modification and destruction during meiotic maturation of the starfish oocyte. *Dev. Biol.* **124**, 248-258.
- Stein, C. A., and Cheng, Y. C.** (1993). Antisense oligonucleotides as therapeutic agents - is the bullet really magical? *Science* **261**, 1004-1012.
- Swenson, K., Farrell, K. M. and Ruderman, J. V.** (1986). The clam embryo protein cyclin A induces entry into M-phase and the resumption of meiosis in *Xenopus* oocytes. *Cell* **47**, 861-870.
- Tanaka, M. and Herr, W.** (1990). Differential transcriptional activation by Oct-1 and Oct-2: interdependent activation domains induce Oct-2 phosphorylation. *Cell* **60**, 375-386.
- Verrijzer, C. P., Kal, A. J. and Van der Vliet, P. C.** (1990). The DNA binding domain (POU domain) of transcription factor Oct-1 suffices for stimulation of DNA replication. *EMBO J.* **9**, 1883-1888.
- Verrijzer, C. P. and Van der Vliet, P. C.** (1993). POU domain transcription factors. *Biochem. Biophys. Acta* **1173**, 1-21.
- Wagenaar, E. B.** (1983). The timing of synthesis of proteins required for mitosis in the cell cycle of the sea urchin embryo. *Exp. Cell Res.* **144**, 393-403.
- Whitaker, M. J. and Steinhardt, R. A.** (1982). Ionic regulation of egg activation. *Quart. Rev. Biophysics* **15**, 593-666.
- Wilt, F. H., Sakai, H. and Mazia, D.** (1967). Old and new protein in the formation of the mitotic apparatus in cleaving sea urchin eggs. *J. Mol. Biol.* **27**, 1-7.
- Zhao, A. Z., Colin, A. M., Bell, J., Baker, M., Char, B. R. and Maxson, R.** (1990). Activation of a late H2B histone gene in blastula-stage sea urchin embryos by an unusual enhancer located 3' of the gene. *Mol. Cell. Biol.* **10**, 6730-6741.

(Accepted 5 April 1994)
